# Supplementary material for: Splice variant of growth hormone-releasing hormone receptor drives esophageal squamous cell carcinoma conferring a therapeutic target
Source: PubMed Central journal article supplement — Proc Natl Acad Sci U S A. 2020 Mar 10;117(12):6726–32. doi: 10.1073/pnas.1913433117 (PMC7104313; doi:10.1073/pnas.1913433117), 2020-03-10
Supplement: pnas.1913433117.sapp.pdf [file pnas.1913433117.sapp.pdf]

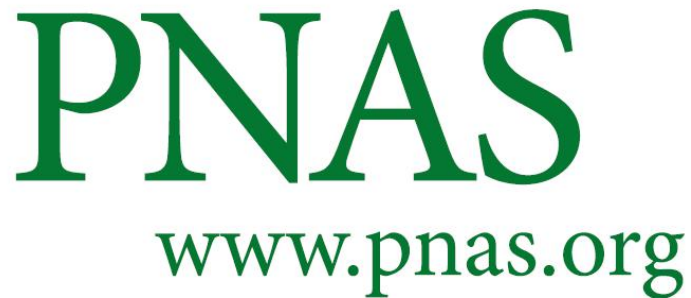

### Supporting Information

**Title:** Splice variant of growth hormone-releasing hormone receptor drives esophageal squamous cell carcinoma conferring a therapeutic target

**Short title:** GHRH-R splice variant as a therapeutic target

**Author:** Xiao Xiong\*, Xiurong Ke\*, Lu Wang\*, Zhimeng Yao, Yi Guo, Xianyang Zhang, Yuping Chen, Chi Pui Pang, Andrew V. Schally, Hao Zhang

1

2 [Contributed by Andrew V. Schally ]

3 Please send only the initial correspondence to: <sup>1</sup>Dr Andrew V. Schally, Research  
4 Service (151), Veterans Affairs Medical Center, 1201 NW 16<sup>th</sup> Street, Miami,  
5 FL33125. E-mail: Andrew.Schally@va.gov

6

7 Subsequent correspondence and galley proof should be sent to:

8 Prof. Hao Zhang

Institute of Precision Cancer Medicine and Pathology, Department of Pathology,  
Jinan University Medical College, Guangzhou, Guangdong, China. Email:  
haozhang@jnu.edu.cn

## SI Materials and Methods

1 **Cells and Cell Culture.** The human ESCC cells HKESC-1, HKESC-2, HKESC-3,  
2 and 2 human immortalized esophageal epithelial cells (NE2 and NE083) were  
3 kindly provided by Dr. S.W. Tsao (University of Hong Kong, China). The human  
4 ESCC cells TE1, TE7 and TE12 cells were kindly provided by Dr. X.C. Xu (M.D.  
5 Anderson Cancer Center, Houston, TX, USA). The human ESCC cells KYSE140,  
6 KYSE150, KYSE510 were obtained from the tumor cell bank of the Chinese  
7 Academy of Medical Science. All cells were tested and authenticated in August  
8 2013 using short tandem repeat validation analysis by the Cell Culture Service,  
9 Beijing Microread Genetics Co., Ltd. (Beijing, China). These ESCC cells were  
10 cultured in DMEM or RPMI 1640 medium supplemented with 10% FBS, 100  
11 unit/mL of penicillin and 100 unit/mL of streptomycin at 37°C in a humidified  
12 atmosphere with 5% CO<sub>2</sub>. Immortalized NE2 and NE083 cells were cultured in  
13 Defined Keratinocyte-SFM (DK-SFM)/Epilife mixed medium (Life Technologies  
14 Gibco/BRL) (1). Hypoxic conditions in the indicated experiments were induced by  
15 putting the cells into a GasPak Pouch (BD Biosciences) for 24 h.

16  
17 **Generation of Stable Cell Lines.** To generate stable cells overexpressing SV1,  
18 PFKM, p65, or silencing p65, cells were seeded onto 6-well dishes and grown to  
19 80% confluence; the pcDNA3.1-SV1 vector, pcDNA3.1-PFKM vector,  
20 pReceiver-Lv201-p65, or psi-LVRU6GP-shp65, psi-LVRU6GP-shSV1 (sequences,  
21 shSV1#1, GGAGTTGTGGCTAGAGAGTCT; shSV1#2,  
22 GGGCCATAGCATCTCTATTGT) along with corresponding control vectors was  
23 transfected into TE1, KYSE140 or KYSE150 cells, respectively, using  
24 Lipofectamine 3000 (Life Technologies) according to the manufacturer's  
25 instructions. Stable transfectants were selected with puromycin (Sigma Aldrich, St  
26 Louis, MO) for 2 weeks. Resistant colonies were pooled and subcultured in the  
27 selection medium.

28

1 **Animal Experiment.** Once an individual tumor reached an average volume of 92  
2 mm<sup>3</sup>, the mice were randomized into five groups (n = 10). All groups were treated  
3 subcutaneously with 5 µg of the GHRH-R antagonist MIA-602 or with vehicle  
4 solution daily for 4 weeks. Tumor volumes were measured every week, and tumor  
5 mass was calculated by the following formula: volume = 0.5236 × length × width<sup>2</sup>.  
6 Mice were killed after 4 weeks of treatment, and tumors were excised for paraffin  
7 block preservation.

8

9 **Cell Viability Assays.** Cell viability was analyzed by CCK-8 assay or monitored  
10 by the xCELLigence RTCA DP system (ACEA Biosciences). Cell Counting Kit-8  
11 (MedChemExpress, New Jersey, USA) was used for CCK-8 assays. Cells were  
12 plated in 96-well plates at a density of 2000 cells in 100 µL medium per well,  
13 starved with medium without FBS for 24 h, followed by treatment with indicated  
14 concentrations of MIA-602 in medium containing 0.5% FBS for 48 h. Then 10 µL of  
15 the CCK-8 solution was added to each well of the plate and incubated at 37 °C for  
16 2 h. The absorbance at 450 nm was measured to calculate the number of vital  
17 cells in each well. For Real-time cell analysis (RTCA), experiments were  
18 performed according to the supplier's instructions. Briefly, TE1 cells were seeded  
19 at a density of 3500 cells and KYSE140 cells at a density of 2000 cells in 100 µL  
20 medium in E-plates per well. The plates were locked into the device and incubated  
21 in at 37 °C in a humidified atmosphere with 5% CO<sub>2</sub>. Cell viabilities were recorded  
22 every 15 min.

23

24 **Colony-Formation Assays.** Colony-formation assays were performed as  
25 described previously (5). Briefly, KYSE150 or KYSE140 cells were seeded into  
26 six-well plates in triplicate at a concentration of 500 cells per well. After 24 h  
27 incubation, the cells were washed with PBS, and then RPMI 1640  
28 (Gibco/Invitrogen) supplemented with either 2% FBS (Gibco/Invitrogen) with  
29 MIA-602 or vehicle solution was added. The medium was changed every 3 d.  
30 Cells were treated for a total of 9 d. The cell colonies then were fixed by methanol

1 and dyed with 0.1% crystal violet; the colonies that contained more than 50 cells  
2 were counted.

3

4 **Cell Migration and Invasion Assay.** Cell migration and invasion assays were  
5 conducted using the xCELLigence RTCA Analyzer (Roche Applied Science,  
6 Mannheim, Germany). Briefly, 150  $\mu$ L of RPMI-1640 supplemented with 10% FBS  
7 was added to the lower chamber in the CIM-16 plate (16-well, 8  $\mu$ m pore filter) and  
8  $3 \times 10^4$  KYSE150 cells in 100  $\mu$ L of serum-free RPMI-1640 were added to the  
9 upper chamber with or without Matrigel coating (BD Biosciences, Bedford, MA,  
10 USA). Cell index values that represented relative changes in electrical impedance  
11 on the underside of the 8  $\mu$ m pore membrane were taken at a 15-minute interval.

12

#### 13 **Measurements of Glucose Uptake and Lactate Production.**

14 Cells were seeded onto 12-well plates to allow attaching for 6-8 h and replaced  
15 with fresh complete medium or medium containing 5  $\mu$ M MIA-602 or control  
16 vehicle. The medium was collected after 48 h incubation by centrifugation to  
17 remove the cells. Glucose uptake and lactate production were measured using the  
18 Glucose (GO) Assay Kit (Sigma Aldrich) and Lactate Assay Kit (Sigma Aldrich)  
19 according to the manufacturer's instruction, respectively.

20

21 **Immunohistochemical Analysis.** We performed immunohistochemistry (IHC)  
22 staining as previously described (2, 3). Briefly, 4  $\mu$ m sections were cut from  
23 formalin-fixed, paraffin-embedded mice tumor tissues were underwent  
24 deparaffinization and rehydration, followed by endogenous peroxidase blocking,  
25 antigen retrieval. Sections of mice tissues incubated overnight at 4  $^{\circ}$ C with  
26 antibodies against Ki67 (Cat. ab16667; Abcam), Anti-PFKM (HPA002117; Sigma),  
27 Phospho-NF- $\kappa$ B p65 (#3033; Cell Signaling Technology), respectively. All sections  
28 were then incubated with the HRP-conjugated secondary antibodies at room  
29 temperature for 1.5 h, followed by incubation with 3, 3'-diaminobenzidine (DAB)

1 substrate to visualize positive staining. Nuclei were counterstained with  
2 hematoxylin. The percentage of positive staining cells was calculated by counting  
3 the number of positive staining cells based on hematoxylin-labeled nuclei, derived  
4 from ten random high-power fields ( $\times 400$ ). The mean of IOD was calculated by  
5 Image Pro Plus v.6.0 image analysis system. All sections were evaluated by two  
6 independent observers.

7

8 **TNF- $\alpha$  Treatment and Immunofluorescence Assay.** Cells were processed  
9 before being subjected to immunofluorescence analysis as described previously  
10 (4) and then were incubated with specific primary antibody against NF- $\kappa$ B p65  
11 (#8242; Cell Signaling Technology) overnight at 4 °C, followed by Alexa Fluor 594  
12 (red)-conjugated donkey anti-rabbit secondary antibody for 1 h in darkness.  
13 Nuclei were stained with DAPI. Images were captured using Zeiss Imager A2a  
14 fluorescence microscope.

15

16 **Reverse Transcription-quantitative PCR (RT-qPCR).** Total RNA was extracted  
17 from the cells or clinical specimens using TRIzol (Invitrogen). Four micrograms of  
18 RNA was reverse-transcribed using M-MLV Reverse Transcriptase (Invitrogen)  
19 with oligo-(dT) 20 primer (Invitrogen) according to the manufacturer's instructions.  
20 Then an equal amount of cDNA was amplified using an SYBR Green PCR  
21 amplification kit (Invitrogen) with the Applied Biosystems 7500 Real Time PCR  
22 system (Applied Biosystems, Foster City, CA, USA) as described previously. The  
23 results were normalized to  $\beta$ -actin as an internal control. All reactions were run in  
24 triplicate. The cDNA was subjected to PCR with the following primers:

25 *GHRH-R* forward: 5'-ATGGGCTGCTGTGCTGGCCAAC-3'

26 *GHRH-R* reverse: 5'-TAAGGTGGAAAGGGCTCAGACC-3'

27 *SV1* forward: 5'-CCACCCTCTCTGTTGCTCAG-3'

28 *SV1* reverse: 5'-GTAAGATTCCTCCTCAGCCAGC-3'

29 *PFKM* forward: 5'-AATGGGCGGATCTTTGCCA-3'

30 *PFKM* reverse: 5'-TGGGGATTCGATGCTCAAATCT-3'

1 *PFKL* forward: 5'-TCGACTGCAGGACCAATGTC-3'  
2 *PFKL* reverse: 5'-CATGCGGTGCTCGAAATCAG-3'  
3 *PFKP* forward: 5'-GACCTTCGTTCTGGAGGTGAT-3'  
4 *PFKP* reverse: 5'-CACGGTTCTCCGAGAGTTTG-3'  
5 *HK2* forward: 5'-CGTCTACAAGAAACACCCCCATT-3'  
6 *HK2* reverse: 5'-ACCTCGCTCCATTTCTACCTTCA-3'  
7 *PKM* forward: 5'-TCGCATGCAGCACCTGATT-3'  
8 *PKM* reverse: 5'-CCTCGAATAGCTGCAAGTGGTA-3'  
9 *p65* forward: 5'-TGGCGAATGGCTCGTCTGTAGT-3'  
10 *p65* reverse: 5'-GGTCTTGGTGGTATCTGTGCTCCT-3'  
11  $\beta$ -*actin* forward: 5'-GAACCCCAAGGCCAACCGCGAGA-3'  
12  $\beta$ -*actin* reverse: 5'-TGACCCCGTCACCGGAGTCCATC-3'

13

14 **Luciferase Assays.** Luciferase assays were performed as described previously  
15 (1). In brief, cells were grown to 80% confluence in a 12-well plate and were then  
16 transiently transfected with 100 ng of luciferase reporter vector and 25 ng of  
17 pRLSV40 control vector using Lipofectamine 2000 (Invitrogen) according to the  
18 manufacturer's instructions. After 24 h transfection, the cells were harvested and  
19 lysed in Luciferase Lysate Buffer (Promega, Madison, WI, USA); both firefly and  
20 Renilla luciferase activities were assayed using a dual-luciferase assay system  
21 (Promega). All experiments were performed in triplicate.

22

23 **Immunoblotting.** Immunoblotting was performed as described previously (5, 6).  
24 Briefly, the cells were lysed in RIPA buffer, and then equivalent amounts of the  
25 protein extracts were resolved using 10% SDS/PAGE and then transferred to a  
26 PVDF membrane. The membranes were blocked in 5% skim milk in TBS  
27 containing 0.1% Tween-20 (TBST) buffer and then incubated with the primary  
28 antibodies against anti-GHRH-R (ab28692; Abcam), Anti-PFKM (HPA002117;  
29 Sigma), NF- $\kappa$ B p65 (#8242; Cell Signaling Technology), Phospho-IKK $\alpha$ / $\beta$  (#2694;  
30 Cell Signaling Technology), Phospho-NF- $\kappa$ B p65 (#3033; Cell Signaling

1 Technology), GAPDH (#5174; Cell Signaling Technology), IKK $\alpha$ / $\beta$  (sc-7606; Santa  
2 Cruz Biotechnology), p-I $\kappa$ B- $\alpha$  (sc-101713; Santa Cruz Biotechnology), I $\kappa$ B- $\alpha$   
3 (sc-371; Santa Cruz Biotechnology), at 4 °C overnight, respectively. After  
4 incubation with the primary antibodies, the secondary antibodies were added and  
5 incubated for 2 h at room temperature. The immunoreactive bands were visualized  
6 with SuperSignal West Pico Chemiluminescent Substrate (Thermo Scientific) and  
7 were exposed to X-ray film (Eastman Kodak).

8

9 **Gene Set Enrichment Analyses.** Gene set enrichment analysis (GSEA) was  
10 performed to examine the association between gene sets and gene expression (7).  
11 Microarray data (accession No. GSE47404) were obtained from the NCBI's Gene  
12 Expression Omnibus (<http://www.ncbi.nlm.nih.gov/geo/>) and analyzed with GSEA  
13 software (version 2.0.13) (<http://www.broadinstitute.org/gsea/index.jsp>).

14

15 **Statistical Analysis.** All statistical analyses were performed using the SPSS 13.0  
16 statistical software package (SPSS Inc.). The correlation between SV1 expression  
17 and clinicopathological features of ESCC patients was analyzed by the  $\chi^2$  test.  
18 Overall survival was estimated using the Kaplan–Meier method, and the difference  
19 in survival was evaluated using the log-rank test. Univariate and multivariate  
20 survival analysis was done with the Cox proportional hazards regression model.  
21 Comparisons between two groups were performed with a Student's *t* test, or  
22 paired *t* test, and comparisons among more than two groups were performed with  
23 one-way ANOVA with post hoc intergroup comparisons. All bar graphs show the  
24 mean  $\pm$  SEM of at least three independent experiments. A *P* value of less than  
25 0.05 was considered statistically significant.

1 **SI Figures and Figure legends**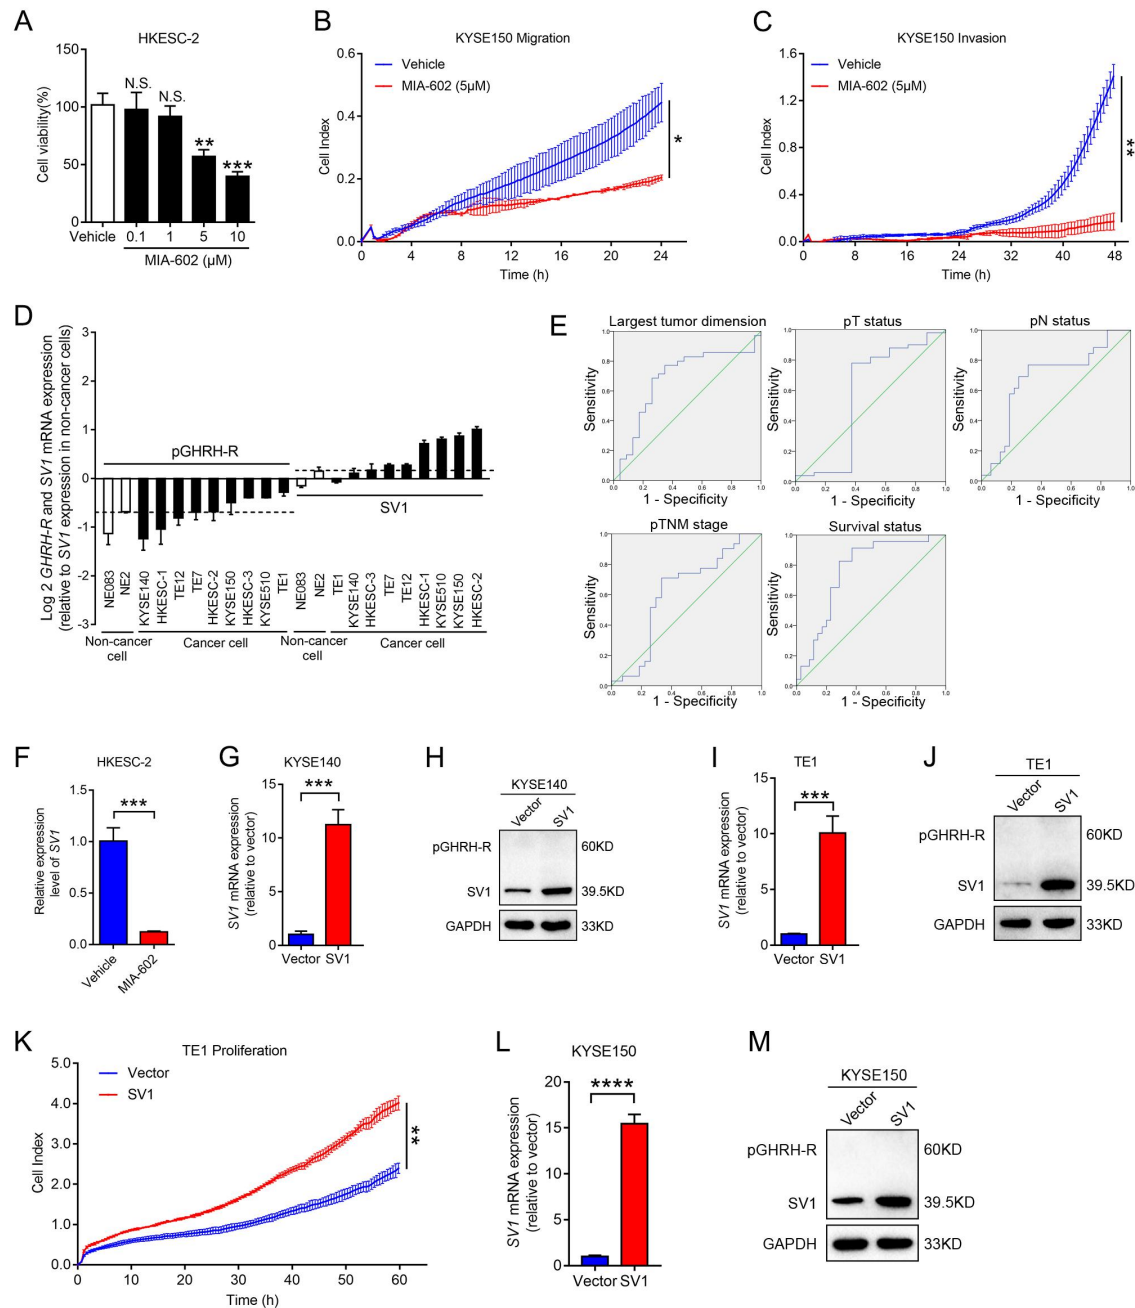

2

3 **Fig. S1. MIA-602 inhibits ESCC cell progression through SV1.** (A) The viability  
 4 of HKESC-2 cells treated with MIA-602 (0.1, 1, 5, or 10  $\mu\text{M}$ ) or vehicle solution for  
 5 48 h was measured by CCK-8 assay. (B-C) Migration (B) and invasion (C) of  
 6 KYSE150 cells treated with MIA-602 or vehicle were monitored by the  
 7 xCELLigence RTCA DP system. Quantitative analysis of the cell index at 24 h  
 8 (migration) and 48 h (invasion) are shown. (D) mRNA levels of *pGHRH-R* and *SV1*  
 9 (relative to *SV1* expression in non-cancer cells) in 2 non-cancer cells (NE2, NE083)



1 ( open bars) and 9 ESCC cells (filled bars) were analyzed by RT-qPCR. Dashed  
2 lines indicate the highest expression of *pGHRH-R* (-0.68) and *SV1* (0.15) in  
3 non-cancer cells. (E) The sensitivity and specificity for each clinical outcome were  
4 plotted. Clinical samples were split into groups with high (n = 28) and low (n = 30)  
5 *SV1* expression by ROC analysis. The blue trace represents ROC curve and the  
6 green trace represents diagonal reference line. (F) HKESC-2 cells were treated  
7 with MIA-602 or vehicle, levels of *SV1* were determined by RT-qPCR. (G-H)  
8 Expression of *SV1* was measured by RT-qPCR (G) and immunoblotting (H) in  
9 KYSE140 cells transfected with *SV1*-overexpressing plasmid or control vector. (I-J)  
10 Expression of *SV1* was measured by RT-qPCR (I) and immunoblotting (J) in TE1  
11 cells transfected with *SV1*-overexpressing plasmid or control vector. GAPDH was  
12 used as an internal control. (K) Proliferation of *SV1*-overexpressing TE1 cells were  
13 monitored by the xCELLigence RTCA DP system. Quantitative analysis of the cell  
14 index at 60 h is shown. (L-M) Expression of *SV1* was measured by RT-qPCR (L)  
15 and immunoblotting (M) in KYSE150 cells transfected with *SV1*-overexpressing  
16 plasmid or control vector. Error bars indicate SEM. N.S., not significant; \* $P < 0.05$ ,  
17 \*\* $P < 0.01$ , \*\*\* $P < 0.001$ , \*\*\*\* $P < 0.0001$  by Student's *t* test (B-C, F-G, I, K-L) or  
18 one-way ANOVA with post hoc intergroup comparisons (A); n = 3 in each group.

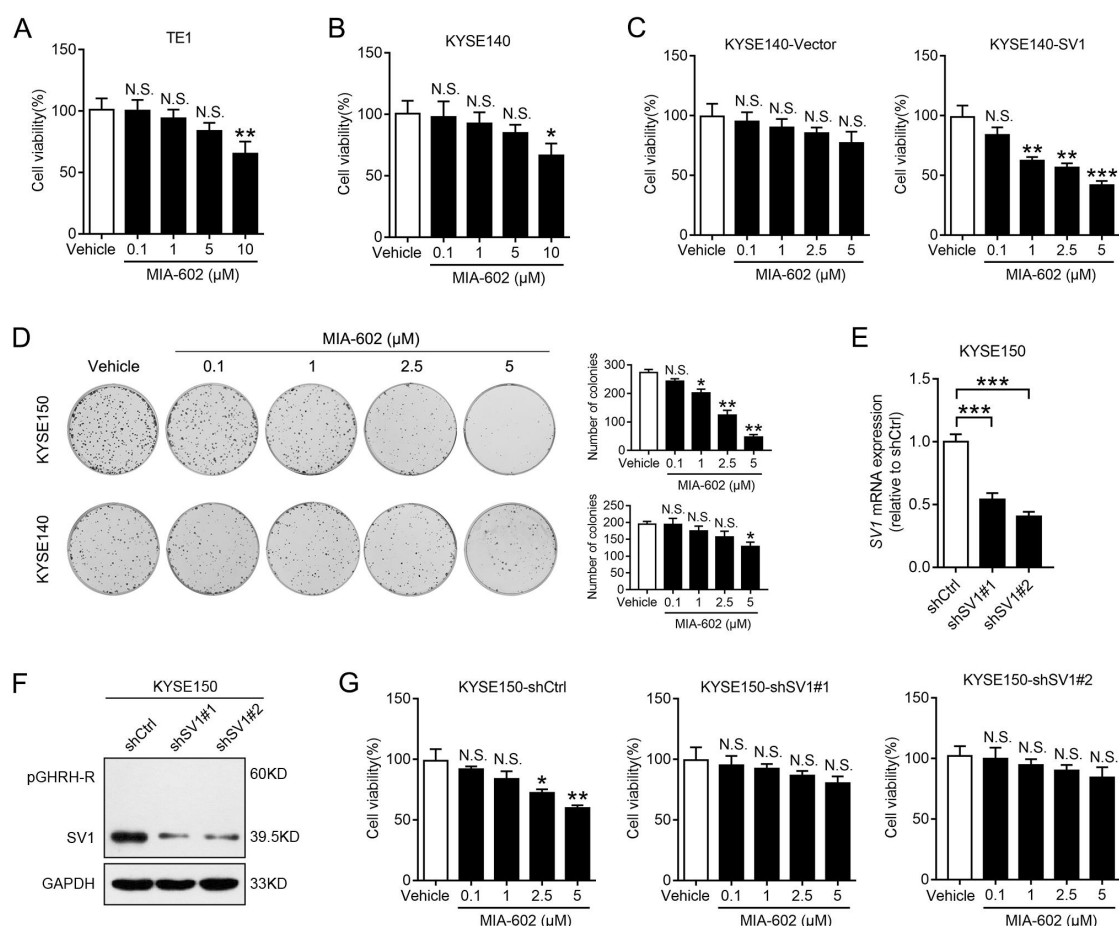

1

2 **Fig. S2. SV1 mediates the inhibitory effects of MIA-602 in ESCC.** (A-B) The  
 3 viability of TE1 (A) and KYSE140 (B) cells treated with MIA-602 (0.1, 1, 5, or 10  
 4 μM) or vehicle solution for 48 h was measured by CCK-8 assay. (C) The viability of  
 5 KYSE140 cells transfected with SV1-overexpressing plasmid or control vector  
 6 treated with MIA-602 (0.1, 1, 2.5, or 5 μM) or vehicle solution for 48 h was  
 7 measured by CCK-8 assay. (D) Clonogenicity of KYSE150 and KYSE140 cells  
 8 treated with MIA-602 (0.1, 1, 2.5, or 5 μM) or vehicle solution was assessed by  
 9 colony formation assay. Quantitative analysis of colony numbers is given on the  
 10 right. (E-F) Expression of SV1 in SV1-knockdown KYSE150 cells were determined  
 11 by RT-qPCR (E) and immunoblotting (F). (G) The viability of KYSE150 cells  
 12 transfected with SV1-specific shRNA or control vector treated with MIA-602 (0.1, 1,  
 13 2.5, or 5 μM) or vehicle solution for 48 h was measured by CCK-8 assay. Error  
 14 bars indicate SEM. N.S., not significant; \* $P < 0.05$ , \*\* $P < 0.01$ , \*\*\* $P < 0.001$  by  
 15 one-way ANOVA with post hoc intergroup comparisons (A-E, G);  $n = 3$  in each

1 group.

2

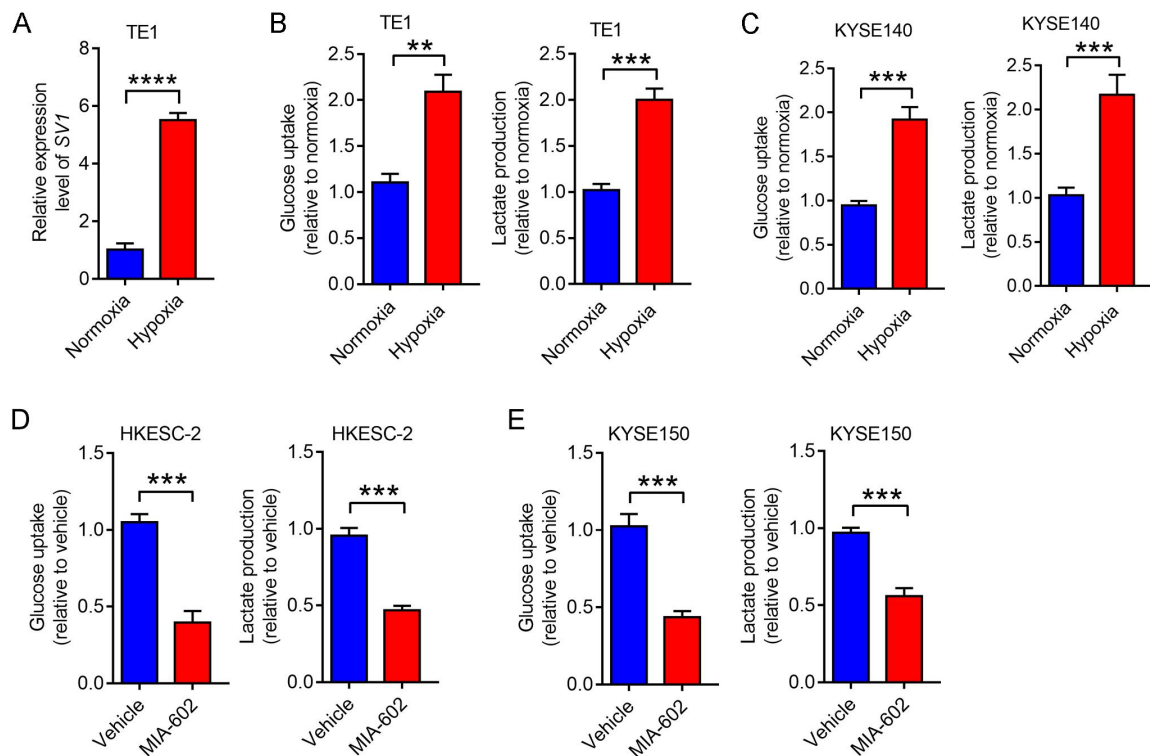

3

4 **Fig. S3. SV1 is induced by hypoxia and enhances glycolysis.** (A) Expression  
 5 of SV1 was measured by RT-qPCR in TE1 cells pre-treated at normoxia or  
 6 hypoxia for 24 h. (B-C) Glucose uptake and lactate production were measured in  
 7 TE1 (B) and KYSE140 (C) cells pre-treated at normoxia or hypoxia for 24 h. (D-E)  
 8 Glucose uptake and lactate production were measured in HKESC-2 (D) and  
 9 KYSE150 (E) cells treated with MIA-602 for 48 h. Error bars indicate SEM. \*\* $P <$   
 10 0.01, \*\*\* $P <$  0.001, \*\*\*\* $P <$  0.0001 by Student's t test;  $n = 3$  in each group.

11

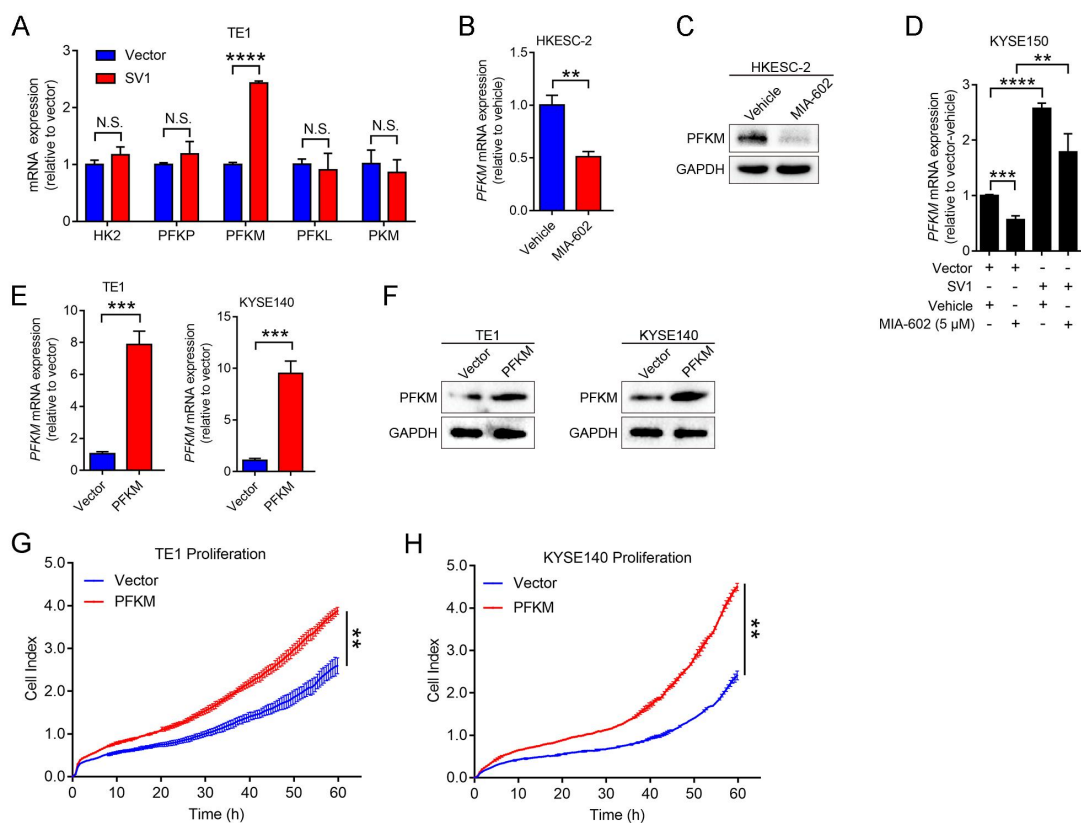

1  
 2 **Fig. S4. SV1 targets PFKM to regulate glycolysis.** (A) mRNA levels of 5 key  
 3 glycolytic enzymes in SV1-overexpressing TE1 cells were determined by  
 4 RT-qPCR. (B-C) Expression of PFKM in HKESC-2 cells treated with MIA-602 for  
 5 48 h was analyzed by RT-qPCR (B) and immunoblotting (C). GAPDH was used as  
 6 an internal control. (D) Expression of PFKM in SV1-overexpressing cells treated  
 7 with MIA-602 or vehicle were analyzed by RT-qPCR. (E-F) Expression of PFKM  
 8 was measured by RT-qPCR (E) and immunoblotting (F) in TE1 and KYSE140 cells  
 9 transfected with PFKM-overexpressing plasmid or control vector. GAPDH was  
 10 used as an internal control. (G-H) Proliferation of PFKM-overexpressing TE1 (G)  
 11 and KYSE140 (H) cells were monitored by the xCELLigence RTCA DP system.  
 12 Quantitative analysis of the cell index at 60 h is shown. Error bars indicate SEM.  
 13 **\*\* $P < 0.01$ , \*\*\* $P < 0.001$ , \*\*\*\* $P < 0.0001$**  by Student's *t* test (A-B, E, G-H) or  
 14 one-way ANOVA with post hoc intergroup comparisons (D);  $n = 3$  in each group.

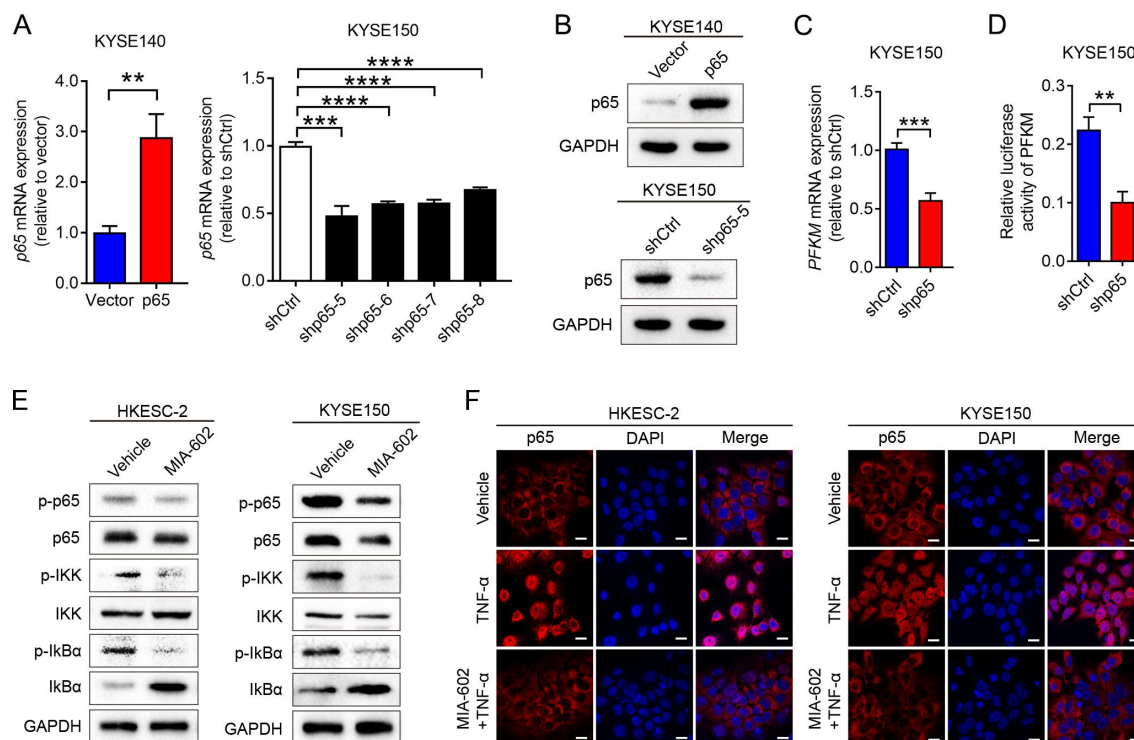

1

2 **Fig. S5. MIA-602 suppresses NF-κB signaling.** (A-B) Expression of p65 in  
 3 p65-overexpressing KYSE140 cells and p65-knockdown KYSE150 cells were  
 4 determined by RT-qPCR (A) and immunoblotting (B) GAPDH was used as an  
 5 internal control. (C) mRNA level of *PFKM* in p65-knockdown cells were  
 6 determined by RT-qPCR. (D) The *PFKM* luciferase reporter was transfected into  
 7 KYSE150-shp65 cells and control shRNA cells, and the relative *PFKM* promoter  
 8 activities were measured based on the luciferase activities. (E) HKESC-2 and  
 9 KYSE150 cells were treated MIA-602 or vehicle before being harvested for  
 10 immunoblot analyses of the labeled antigens. GAPDH was used as an internal  
 11 control. (F) Subcellular localization of p65 (red) in HKESC-2 and KYSE150 cells,  
 12 as analyzed by an immunofluorescence confocal assay. Nuclei were stained with  
 13 DAPI (blue). Error bars indicate SEM. \*\* $P < 0.01$ , \*\*\* $P < 0.001$ , \*\*\*\* $P < 0.0001$  by  
 14 Student's *t* test (A, Left, C-D) or one-way ANOVA with post hoc intergroup  
 15 comparisons (A, Right);  $n = 3$  in each group.

1 **Table S1. Correlation between *SVI* expression and clinicopathological factors in**  
 2 **ESCC patients**

| Clinicopathological factors  | n  | <i>SVI</i> expression  |                         | <i>P</i> value |
|------------------------------|----|------------------------|-------------------------|----------------|
|                              |    | Low <i>SVI</i> , n (%) | High <i>SVI</i> , n (%) |                |
| Patients                     | 58 | 30 (51.7%)             | 28 (48.3%)              |                |
| Gender                       |    |                        |                         |                |
| Male                         | 37 | 19 (51.4%)             | 18 (48.6%)              | 0.940          |
| Female                       | 21 | 11 (52.4%)             | 10 (47.6%)              |                |
| Age (years)                  |    |                        |                         |                |
| ≤ 60                         | 31 | 18 (58.1%)             | 13 (41.9%)              | 0.300          |
| > 60                         | 27 | 12 (44.4%)             | 15 (55.6%)              |                |
| Esophageal location          |    |                        |                         |                |
| Upper/Middle                 | 49 | 25 (51.0%)             | 24 (49.0%)              | 0.802          |
| Lower                        | 9  | 5 (55.6%)              | 4 (44.4%)               |                |
| Histological differentiation |    |                        |                         |                |
| Well                         | 20 | 11 (55.0%)             | 9 (45.0%)               | 0.717          |
| Moderately/Poorly            | 38 | 19 (50.0%)             | 19 (50.0%)              |                |
| Largest tumor dimension (cm) |    |                        |                         |                |
| < 5                          | 23 | 17 (73.9%)             | 6 (26.1%)               | 0.006          |
| ≥ 5                          | 35 | 13 (37.1%)             | 22 (62.9%)              |                |
| pT status                    |    |                        |                         |                |
| T1-T2                        | 8  | 5 (62.5%)              | 3 (37.5%)               | 0.511          |
| T3-T4                        | 50 | 25 (50.0%)             | 25 (50.0%)              |                |
| pN status                    |    |                        |                         |                |
| N0                           | 32 | 22 (68.8%)             | 10 (31.3%)              | 0.004          |
| N1-N3                        | 26 | 8 (30.8%)              | 18 (69.2%)              |                |
| pTNM stage                   |    |                        |                         |                |
| I-II                         | 27 | 18 (66.7%)             | 9 (33.3%)               | 0.034          |
| III                          | 31 | 12 (38.7%)             | 19 (61.3%)              |                |

3 pT, pathological tumor; pN, pathological nodal; pTNM, pathological  
 4 tumor-node-metastasis.

1 **Table S2. Univariate and multivariate Cox proportional hazards model predicting survival in ESCC patients**

| Clinicopathological factors  | Univariate analysis  |                | Multivariate analysis model 1 |                | Multivariate analysis model 2 |                |
|------------------------------|----------------------|----------------|-------------------------------|----------------|-------------------------------|----------------|
|                              | HR (95% CI)          | <i>P</i> value | HR (95% CI)                   | <i>P</i> value | HR (95% CI)                   | <i>P</i> value |
| Gender                       |                      |                |                               |                |                               |                |
| Male vs. Female              | 1.758 (0.693-4.461)  | 0.235          | 2.031 (0.759-5.436)           | 0.159          | 2.006 (0.759-5.303)           | 0.160          |
| Age (years)                  |                      |                |                               |                |                               |                |
| ≥ 60 vs. < 60                | 1.632 (0.711-3.744)  | 0.248          | 1.528 (0.633-3.689)           | 0.346          | 2.385 (0.994-5.723)           | 0.051          |
| Esophageal location          |                      |                |                               |                |                               |                |
| Lower vs. Upper/Middle       | 0.814 (0.242-2.746)  | 0.741          |                               |                |                               |                |
| Histological differentiation |                      |                |                               |                |                               |                |
| Moderately/Poorly vs. Well   | 1.088 (0.460-2.571)  | 0.847          |                               |                |                               |                |
| Largest tumor dimension (cm) |                      |                |                               |                |                               |                |
| ≥ 5 vs. < 5                  | 2.762 (1.024-7.447)  | 0.045          |                               |                | 2.082 (0.754-5.750)           | 0.157          |
| pT status                    |                      |                |                               |                |                               |                |
| T3-T4 vs. T1-T2              | 4.398 (0.586-32.997) | 0.150          | 3.401 (0.444-26.052)          | 0.239          |                               |                |
| pN status                    |                      |                |                               |                |                               |                |
| N1-N3 vs. N0                 | 1.978 (0.865-4.522)  | 0.106          |                               |                |                               |                |
| pTNM stage                   |                      |                |                               |                |                               |                |
| III vs. I-II                 | 3.526 (1.376-9.035)  | 0.009          |                               |                | 3.621 (1.369-9.579)           | 0.010          |
| SVI expression               |                      |                |                               |                |                               |                |
| High vs. Low                 | 5.045 (1.866-13.640) | 0.001          | 4.269 (1.547-11.775)          | 0.005          |                               |                |

2 HR, hazard ratio; CI, confidence interval

**SI References**

- 1 1. Dong H, *et al.* (2017) Reciprocal androgen receptor/interleukin-6 crosstalk  
2 drives oesophageal carcinoma progression and contributes to patient  
3 prognosis. *The Journal of pathology* 241(4):448-462.
- 4 2. Dong H, *et al.* (2017) PTPRO represses ERBB2-driven breast oncogenesis  
5 by dephosphorylation and endosomal internalization of ERBB2. *Oncogene*  
6 36(3):410-422.
- 7 3. Gan J, *et al.* (2015) Dysregulation of PAK1 Is Associated with DNA Damage  
8 and Is of Prognostic Importance in Primary Esophageal Small Cell  
9 Carcinoma. *International journal of molecular sciences* 16(6):12035-12050.
- 10 4. Gan JF, *et al.* (2016) Growth hormone-releasing hormone receptor  
11 antagonists inhibit human gastric cancer through downregulation of  
12 PAK1-STAT3/NF-kappa B signaling. *Proceedings of the National Academy*  
13 *of Sciences of the United States of America* 113(51):14745-14750.
- 14 5. Tang Q, *et al.* (2013) Resveratrol-induced apoptosis is enhanced by  
15 inhibition of autophagy in esophageal squamous cell carcinoma. *Cancer*  
16 *letters* 336(2):325-337.
- 17 6. Wang L, *et al.* (2018) The oncogenic roles of nuclear receptor coactivator 1  
18 in human esophageal carcinoma. *Cancer medicine* 7(10):5205-5216.
- 19 7. Yu J, *et al.* (2019) Detection of Exosomal PD-L1 RNA in Saliva of Patients  
20 With Periodontitis. *Frontiers in genetics* 10:202.
- 21
